1           **Targeting extracellular glycans: Tuning multimeric**  
2           **boronic acids for pathogen-selective killing of**  
3           ***Mycobacterium tuberculosis***

4  
5           Collette S. Guy,<sup>a,b</sup> Matthew I. Gibson<sup>b,c\*</sup> and Elizabeth Fullam<sup>a\*</sup>

6  
7  
8   <sup>a</sup> School of Life Sciences, University of Warwick, UK, CV4 7AL.

9   E-mail: [e.fullam@warwick.ac.uk](mailto:e.fullam@warwick.ac.uk)

10   <sup>b</sup> Department of Chemistry, University of Warwick, Coventry, UK, CV4 7AL. E-mail:

11   [m.i.gibson@warwick.ac.uk](mailto:m.i.gibson@warwick.ac.uk)

12   <sup>c</sup> Warwick Medical School, University of Warwick, Coventry, UK, CV4 7AL.

13

14

15

16

17 **Abstract**

18 Innovative chemotherapeutic agents that are active against *Mycobacterium tuberculosis* (*Mtb*) are  
19 urgently required to control the tuberculosis (TB) epidemic. The *Mtb* cell envelope has distinct  
20 (lipo)polysaccharides and glycolipids that play a critical role in *Mtb* survival and pathogenesis and  
21 disruption of pathways involved in the assembly of the *Mtb* cell envelope are the primary target of  
22 anti-tubercular agents. Here we introduce a previously unexplored approach whereby chemical agents  
23 directly target the extracellular glycans within the unique *Mtb* cell envelope, rather than the  
24 intracellular biosynthetic machinery. We designed and synthesised multimeric boronic acids that are  
25 selectively lethal to *Mtb* and function by targeting these structurally unique and essential *Mtb* cell  
26 envelope glycans. By tuning the number of, and distance between, boronic acid units high selectivity  
27 to *Mtb*, low cytotoxicity against mammalian cells and no observable resistance was achieved. This  
28 non-conventional approach may prevent the development of drug-resistance and will act as a platform  
29 for the design of improved, pathogen-specific, next generation antibiotics.

30

## 31 **Introduction**

32 *Mycobacterium tuberculosis*, the causative agent of tuberculosis (TB), is the world's leading cause of  
33 death from a single infectious agent claiming the lives of 1.7 million people annually.<sup>1</sup> The incidence  
34 of drug resistant strains of *Mtb* are increasing at an alarming rate and include the emergence of *Mtb*  
35 that is not treatable with any of the current antibiotic regimens.<sup>1</sup> Consequently, there is an urgent need  
36 for the development of innovative, next-generation anti-tubercular treatments which function by  
37 distinct mechanisms compared to the current drugs available. *Mtb* possesses a distinctive cell  
38 envelope that is uniquely complex and rich in a diverse range of unusual carbohydrates and lipids.<sup>2</sup>  
39 The cell envelope has a fundamental role in the pathogenesis and virulence of *Mtb* and provides a  
40 highly efficient permeability barrier that prevents intracellular access to many antibiotics and severely  
41 complicates anti-tubercular treatment regimens. The core of the *Mtb* cell wall is comprised of three  
42 main components: a cross-linked peptidoglycan (PG) network, a highly branched arabinogalactan  
43 (AG) with both arabinose and galactose found in the furanose form, and long chain (C<sub>60-90</sub>) mycolic  
44 acids.<sup>3</sup> The outer 'myco-membrane' contains a large array of distinct glycolipids and lipoglycans that  
45 are interspersed within this core and include phosphatidylinositol mannosides (PIMS), phthiocerol  
46 dimycocerosates (PDIMs), lipomannan (LM), lipoarabinomannan (LAM), mannose-capped LAM  
47 (ManLAM), sulfolipids and trehalose mono- and di-mycolates (TMM, TDM).<sup>4</sup> The final component  
48 of the *Mtb* envelope is an outer capsule composed of polysaccharides, predominantly  $\alpha$ -glucan, and  
49 proteins.<sup>5, 6</sup> Intriguingly, many of these carbohydrates are specific to the *Mycobacterium* genus and  
50 are found in unusual conformations with distinct glycosidic linkages. Molecular pathways directly  
51 involved in the biosynthesis of the *Mtb* cell envelope have proven to be especially vulnerable to  
52 chemotherapeutic agents and include the front-line drugs isoniazid<sup>7</sup> and ethambutol<sup>8</sup> and second-line  
53 drugs ethionamide<sup>7</sup> and D-cycloserine.<sup>9, 10</sup> The current TB drug development portfolio capitalises on  
54 validated, druggable intracellular pathways involved in the synthesis of mycobacterial cell envelope  
55 components and include TBA-7371,<sup>11</sup> BTZ043,<sup>12</sup> PBTZ169<sup>13</sup> and OPC-167832<sup>14, 15</sup> that all kill *Mtb*  
56 by inhibition of the biosynthesis of arabinan.

57

58 The *Mtb* cell wall glycans are essential for its survival and pathogenesis<sup>4, 16-19</sup> and any disruption of  
59 the macromolecular complex can be lethal to the survival of the pathogen.<sup>12, 19, 20</sup> Therefore, there is  
60 the tantalizing potential that these pathogen specific extracellular cell envelope glycans may,  
61 themselves, be viable therapeutic targets and afford a strategy for overcoming the intrinsic *Mtb* cell  
62 envelope barrier. To evaluate this idea further (Fig. 1), we selected to develop synthetic glycan  
63 receptors with selectivity for *Mtb* glycans as they are highly tunable and more stable under  
64 physiological conditions than biological counterparts.<sup>21</sup> We selected to exploit the boronic acid  
65 pharmacophore that is an established glycan-binding functional group and forms bonds with cis 1,2  
66 and 1,3 diols that are present in carbohydrates.<sup>22</sup> In addition, a number of boron containing agents are

67 compatible for use in humans with a number of FDA approved boron-drugs in clinical use in other  
68 disease areas<sup>23-25</sup>.

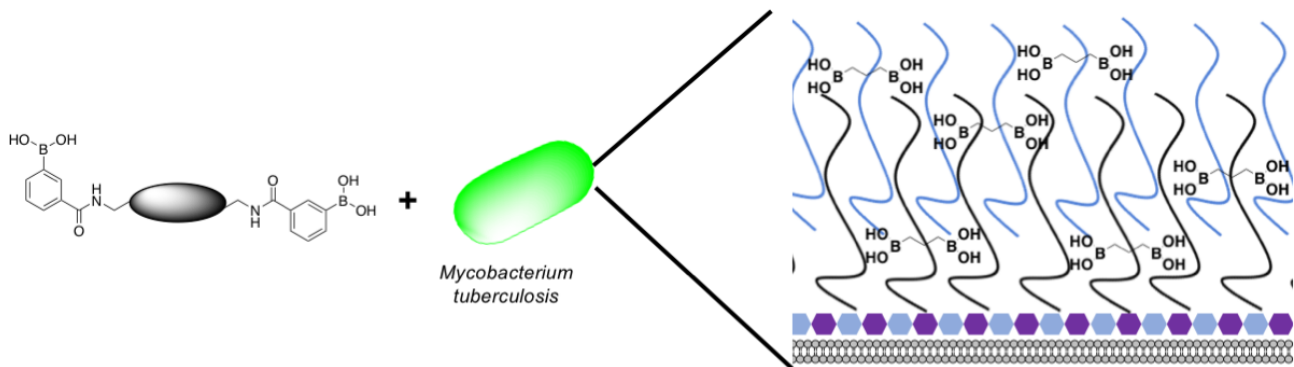

69

70 **Fig. 1.** Overview of the approach used in this study. Illustration highlighting the design of multimeric boronic  
71 acids to specifically target the extracellular *Mtb* cell-envelope glycans. The complex *Mtb* cell envelope is  
72 simplified by black and blue lines, hexagons represent the peptidoglycan layer. This approach has several  
73 advantages over current strategies that include: no requirement for the molecule to cross the impenetrable *Mtb*  
74 cell wall barrier and the potential avoidance of drug efflux challenges.  
75

76 We report here a new class of multimeric boronic acids which specifically kill *Mtb* through specific  
77 binding to *Mtb* cell envelope glycans. The most active compounds selectively kill mycobacteria over  
78 other strains of bacteria and exhibited low cytotoxicity to human cells. Whole-cell proteomics reveals  
79 a broad physiological stress response that does not result in the generation of resistance. The  
80 separation distance between the boronic acids was shown to be crucial for both activity and  
81 selectivity. These findings suggest that new classes of anti-tubercular therapies based on targeting the  
82 unique extracellular components are possible.

83

84

85

## 86 **Results and Discussion**

### 87 **Design and synthesis of multimeric boronic acids**

88 To explore the potential of multivalent boronic acid analogues to selectively target *Mtb* glycans, we  
89 designed and synthesised a panel of compounds (**1-8**) to evaluate the effect of the number and  
90 separation of boronic acids units to selectively target *Mtb* glycans and kill *Mtb*. A range of compounds  
91 bearing the glycan-targeting unit, 3-carboxy-phenyl boronic acid (3-CPBA), were synthesised (**4-8**)  
92 using acid chloride or carbodiimide coupling with the appropriate di- or tetra- PEG (polyethylene  
93 glycol) amine to provide flexibility of the spacer group between the relative position of the boronic  
94 acid functional groups (Supplementary schemes 1-3), giving the focused panel shown in Fig. 2  
95 (details provided in Supplementary information, Schemes S1-S3, Figs S7-22). Systematic variation  
96 of the distance between the boronic acids (~ 1.5 - 10 nm) was achieved using variable lengths of PEG  
97 (poly(ethylene glycol) diamines (**5-7**). Compound **4** had an ethyl linker as a further control, but longer  
98 alkyl chains were not soluble. For **8**, a first generation PAMAM (polyamidoamine) dendrimer core  
99 was synthesised and used to generate a tetrameric boronic acid (Supplementary information, Scheme  
100 S3). Systematic variation of the distance between the boronic acids (1.6 - 10 nm) was achieved using  
101 variable lengths of PEG (**5-7**). To ensure the boronic acids were accessible for glycan binding the  
102 Alizarin red (ARS) assay was employed to map the selectivity of the dimeric boronic acids against a  
103 panel of carbohydrates and were found to retain the same affinity trends as the monomeric boronic  
104 acids (Fig. S1).

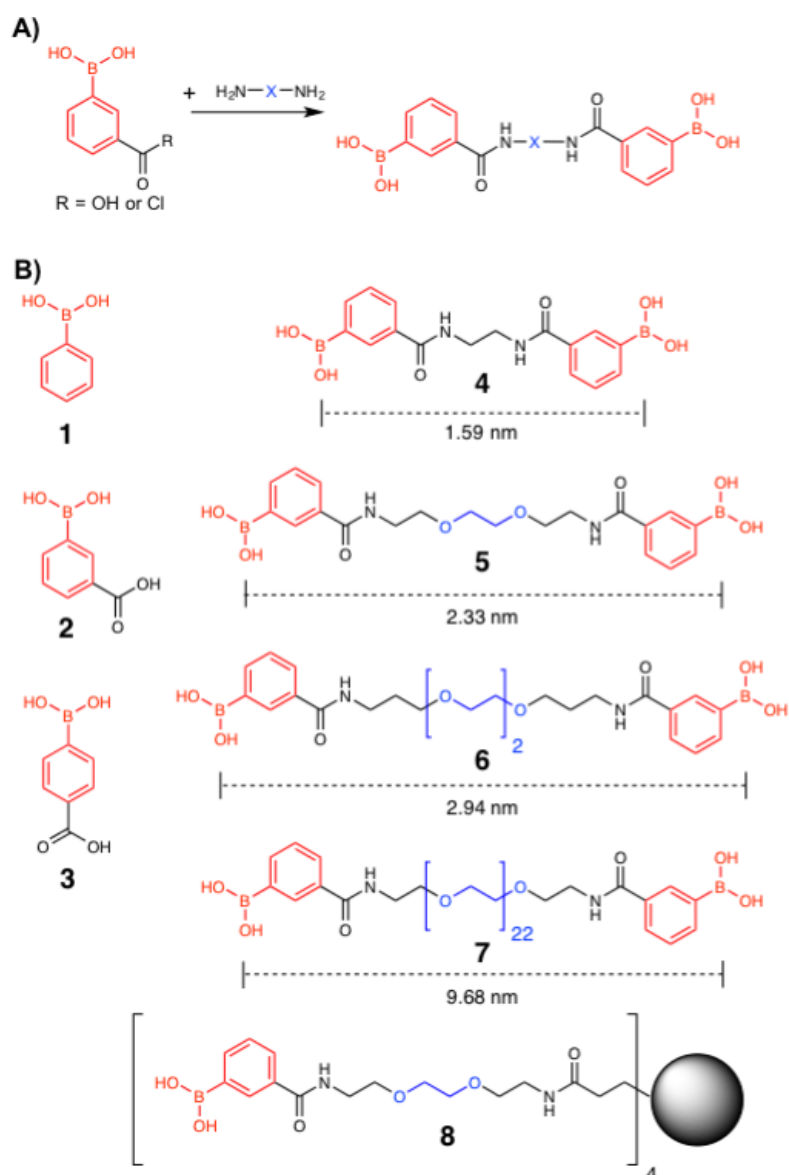

105

106 **Fig. 2.** Boronic acid panel. A) Overview of synthetic approach; B) 1 – 3 were commercially available. 4 – 8  
107 were synthesised as detailed in the Supplementary Information. Distances indicate the boron-boron distances  
108 assuming a fully extended chain: Angles of  $109^\circ$  and bond distances of 0.15 nm. Black circle is G1 PAMAM  
109 dendrimer.

110

## 111 **Determination of antibacterial potency**

112 This library of glycan-targeting compounds was evaluated for antibacterial activity using the  
113 resazurin-reduction assay<sup>26</sup> to determine the minimum inhibitory concentrations (MIC) (Fig. 3 and  
114 Table 1). The Gram-negative organisms *Escherichia coli* and *Pseudomonas putida* do not display the  
115 complex cell wall glycans of mycobacteria, and were tested alongside *Mycobacterium smegmatis*,  
116 *Mycobacterium bovis* BCG and also against *Mtb*. The monomeric boronic acids (**1-3**) displayed low  
117 antibacterial potency with no selective preference for Gram-negative or mycobacterial strains.  
118 Remarkably, exposure of the same strains to the dimeric boronic acids **4-6**, which vary in distance  
119 between the boronic acids from 12 – 23 atoms (1.6 – 3 nm), resulted in a dramatic decrease in the  
120 MICs (780 - 3100  $\mu$ M against mycobacteria, Fig. 3, Table 1) and a corresponding increase in  
121 selectivity for mycobacteria compared to Gram-negative organisms. Notably, the dimeric compounds  
122 **4-6** were more effective against *Mtb* and *M. bovis* BCG than the widely used non-pathogenic model  
123 organism *M. smegmatis*, which is faster growing. Compound **7**, with a longer linker (~ 10 nm) was  
124 ineffective, with higher MICs and loss of specificity for mycobacteria. Compound **8**, based on a 1<sup>st</sup>  
125 generation poly(amidoamine) dendrimer, also showed mycobacterial selectivity with similar MIC  
126 values to the dimers **4-6** (MIC 780  $\mu$ M, against *Mtb*). These results indicate that an optimal spacer  
127 length of 1.6 – 3 nm (compounds **4-6**) between the two boronic acid moieties is optimal whereas  
128 longer lengths > 9 nm (**7**) reduce potency and fits a hypothesis of cell-wall glycan chelation.

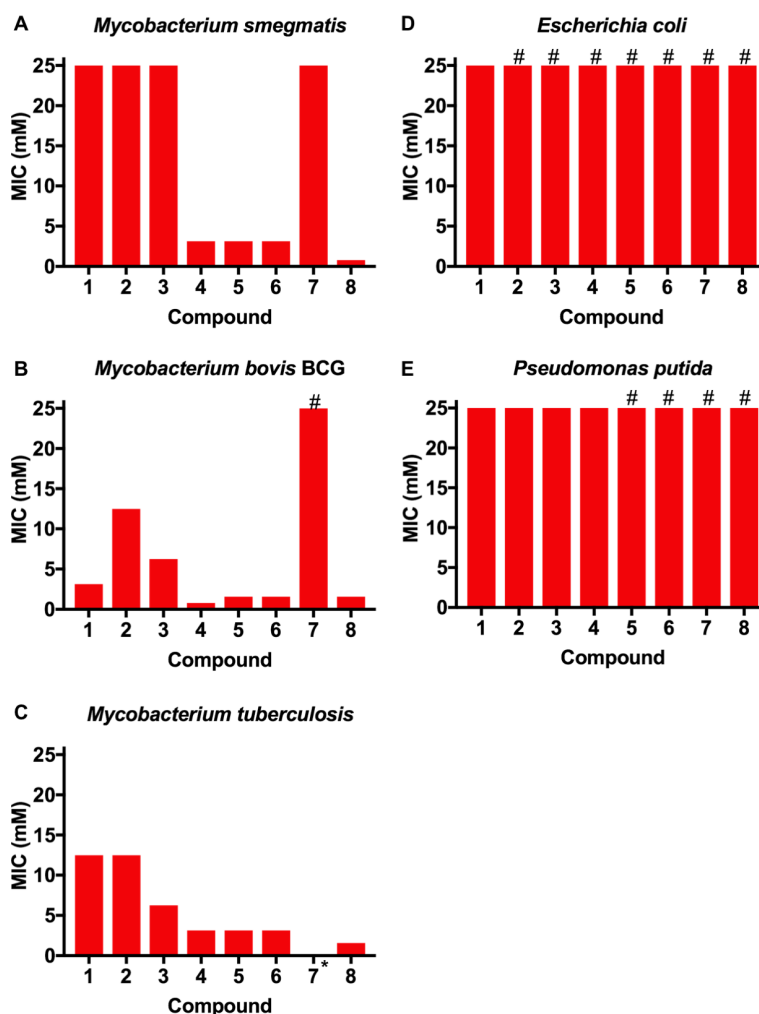

129

130 **Fig. 3.** Antimicrobial activities of boronic acid derivatives 1-8 against A) *M. smegmatis*, B) *M. bovis* BCG, C)  
 131 *M. tuberculosis*, D) *E. coli* E) *P. putida*. \*, not tested; # represents MIC value greater than the maximum value  
 132 tested (> 25 mM).  
 133

134 **Table 1.** Bacterial susceptibility as measured by resazurin reduction microtitre plate assay

|          | MIC Mycobacteria (mM)          |                                |                                   | MIC Gram-negative (mM)  |                           |
|----------|--------------------------------|--------------------------------|-----------------------------------|-------------------------|---------------------------|
|          | <i>Mycobacterium smegmatis</i> | <i>Mycobacterium bovis</i> BCG | <i>Mycobacterium tuberculosis</i> | <i>Escherichia coli</i> | <i>Pseudomonas putida</i> |
| <b>1</b> | 12.5-25                        | 3.13                           | 6.25-12.5                         | 25                      | 12.5-25                   |
| <b>2</b> | 12.5-25                        | 12.5                           | 6.25-12.5                         | >25                     | 12.5-25                   |
| <b>3</b> | 25                             | 6.25                           | 6.25                              | >25                     | 25                        |
| <b>4</b> | 3.13                           | 0.78                           | 1.56-3.13                         | >25                     | >25                       |
| <b>5</b> | 3.13                           | 0.78-1.56                      | 1.56-3.13                         | >25                     | >25                       |
| <b>6</b> | 3.13                           | 0.78-1.56                      | 1.56-3.13                         | >25                     | >25                       |
| <b>7</b> | 25                             | >25                            | -                                 | >25                     | >25                       |
| <b>8</b> | 0.78                           | 1.56                           | 0.78-1.56                         | >25                     | >25                       |

135

136

137 Minimal bactericidal concentrations (MBCs) were also determined against *Mtb* for 4-6. The MBC  
 138 data demonstrates that these boronic acid dimers are bactericidal against actively growing *Mtb*  
 139 at concentrations of 6.25 mM (Table S1).



## 140 ***In vitro* cytotoxicity**

141 The panel of boronic acids showed no significant cytotoxicity against human lung A549 cells with  
142 MIC<sub>99</sub> values above 25 mM, and no lysis or agglutination of red blood cells was observed at  
143 concentrations as high as 25 mM (Table S2). The active dimers (**4-6**) and tetramer **8** therefore show  
144 higher selectivity for mycobacteria compared to the mammalian cells tested that have distinct cell-  
145 surface glycans.

146

## 147 **Lack of cross-resistance between dimeric boronic acid analogues and rifampicin and** 148 **meropenem**

149 To evaluate if the most active compounds (**4-6**) interacted with the front-line anti-tubercular agent  
150 rifampicin a checkerboard assay was used. No synergistic or antagonistic effects were noted with the  
151 sum of the fractional inhibitory index ( $\Sigma$ FIC) calculated as 2. Mono-boronic acids have been reported  
152 as having  $\beta$ -lactamase inhibitory activity<sup>27,28</sup> and we therefore evaluated boronic acid dimers **4-6** for  
153 compound interactions with the  $\beta$ -lactam meropenem on *Mtb*. The  $\Sigma$ FIC for each combination was  
154 calculated<sup>29</sup> and found to be 1 for compound **4** and 0.6 for compounds **5-6** indicating no synergetic  
155 and importantly no antagonistic action on the growth inhibition, compared to the synergistic activity  
156 of meropenem in combination with the  $\beta$ -lactamase inhibitor sulbactam with a  $\Sigma$ FIC 0.3 (Table S3).  
157 These observations provide evidence that the multivalent boronic acids have a unique mechanism of  
158 action compared to the monomeric boronic acid  $\beta$ -lactamase transition state inhibitors and are not  
159 inhibitors of mycobacterial  $\beta$ -lactamase targets. Guided by the above results, we attempted to obtain  
160 resistant mutants of *M. bovis* BCG when plating on 5x MIC compound **5** but were unable to obtain  
161 mutants over a period of 3 months. This can be indicative that these dimeric compounds have a  
162 multifaceted mode of action. A low level of resistance has been found for antibiotics that target cell  
163 wall precursors including vancomycin, which took over 30 years for resistance to occur<sup>30</sup>, and the  
164 newly discovered texiobactin.<sup>31</sup>

165

## 166 **Identification of *Mtb* glycans as targets of dimeric boronic acids**

167 To probe the selectivity and affinity of the 3-CPBA towards *Mtb* glycans biolayer interferometry  
168 (BLI) was employed (Fig. 4). A biotinylated boronic acid was synthesised (Scheme S4) and  
169 immobilised to streptavidin functionalised sensors. In control experiments against dextran and  
170 galactan that do not contain cis-diols, and are absent from the *Mtb* cell envelope, no binding was  
171 observed (Fig S4). A panel of isolated *Mtb* cell envelope components (Fig. 4) (additional information  
172 in supplementary information Figs S2-S4) were subsequently evaluated by BLI, revealing that the  
173 boronic acids interacted strongly with *Mtb* components that contain glycans with cis-diols (Fig. 4,  
174 Fig. S3): PG, AG, TMM, TDM, LAM and LM.  $K_d$  values were obtained using a steady-state model,

175 giving values of  $41 \mu\text{g}\cdot\text{mL}^{-1}$  (PG),  $4 \mu\text{M}$  (TDM) and  $12 \mu\text{M}$  (TMM). Despite strong binding observed  
 176 to AG we were unable to calculate the  $K_d$  value as saturation was not reached. In comparison, weak  
 177 binding affinity towards PIM6 (which has six mannoses decorating the PIM unit) was observed, and  
 178 very weak binding for PIM 1+2 (which have correspondingly lower degrees of glycosylation) and  
 179 notably, no detectable binding for isolated mycolic acid methyl esters (MAMEs) and sulpholipid I  
 180 which contains a sulphated trehalose moiety. This is consistent with a multivalent interaction between  
 181 cell wall components that contain cis-diols and the boronic acid and clearly demonstrates that boronic  
 182 acids have the necessary capacity to engage with these essential *Mtb* cell envelope constituents. As a  
 183 final test, whole *E. coli* and (gamma-irradiated) *Mtb* cells were evaluated by BLI for binding to the  
 184 boronic acid functionalised sensors. *Mtb* gave significantly faster rates and extent of binding  
 185 compared to *E. coli* (Fig. 4C). Taken together, this BLI data supports a hypothesis that multimeric  
 186 boronic acids selectively target mycobacterial cell wall glycans, leading to the observed bactericidal  
 187 activity.

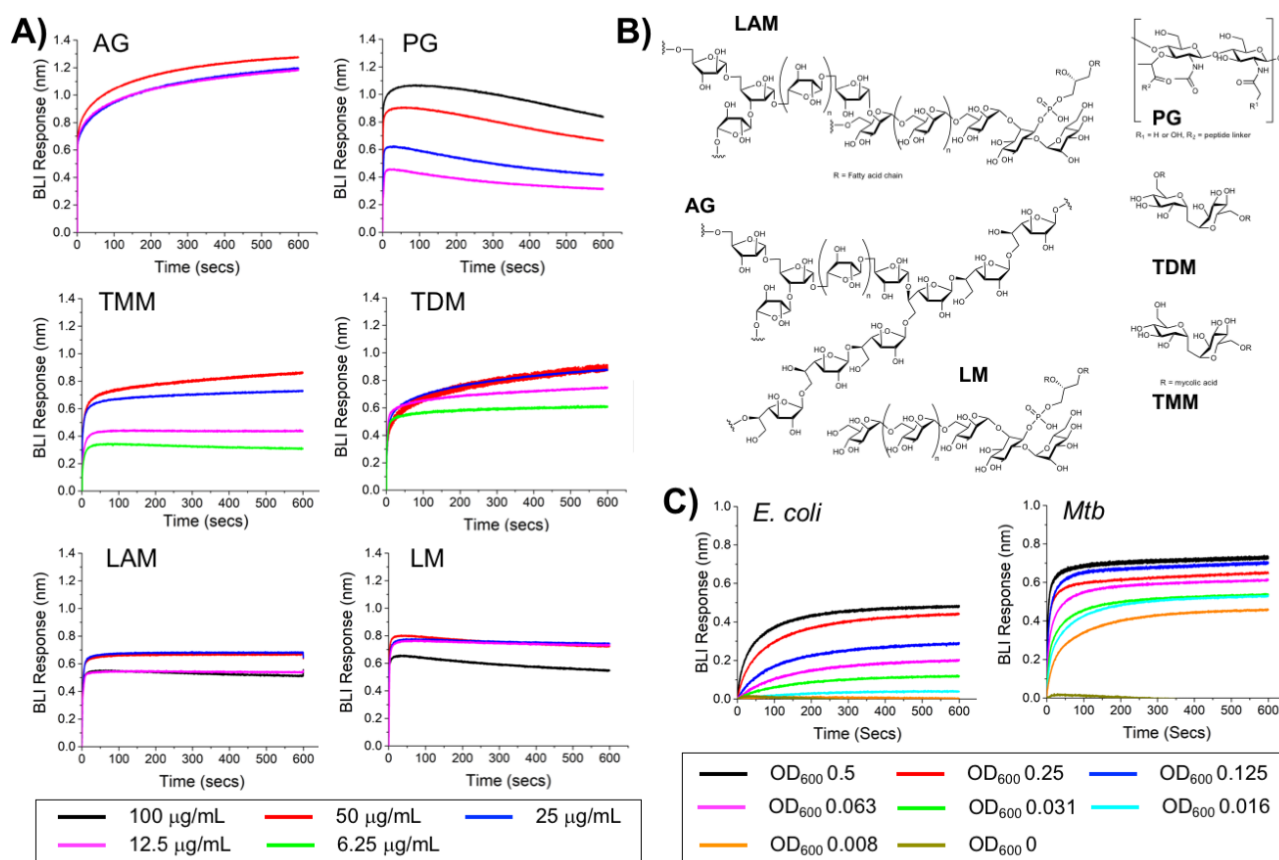

188

189 **Fig 4.** Biolayer interferometry analysis against 3-carboxy boronic acid functional sensor A) isolated *Mtb* cell  
 190 envelope components, B) Structure of *Mtb* cell-envelope components, C) Whole *E. coli* and (gamma-  
 191 irradiated) *Mtb* cells.

192

193

194 **Global protein expression response of *M. bovis* BCG to dimeric boronic acids**

195 To gain physiological insight into the mode of action of these multimeric boronic acids, whole cell  
196 proteomics was employed. *M. bovis* BCG was exposed to 2x MIC of compound **6** and analysis of  
197 the whole cell protein expression profile at 3 hours, 24 hours and 48 hours was performed. Overall,  
198 we identified a total of >1,480 proteins and determined the differential expression after exposure to  
199 the boronic acid dimer (**6**) over time (Fig. S6). The proteins were sorted by their functional category  
200 based on the Tuberculist<sup>32</sup> designations (Fig. 5, Fig. S6). A list for all the identified proteins,  
201 annotations and fold changes compared to controls at each time point are in Supplementary List S1.

202

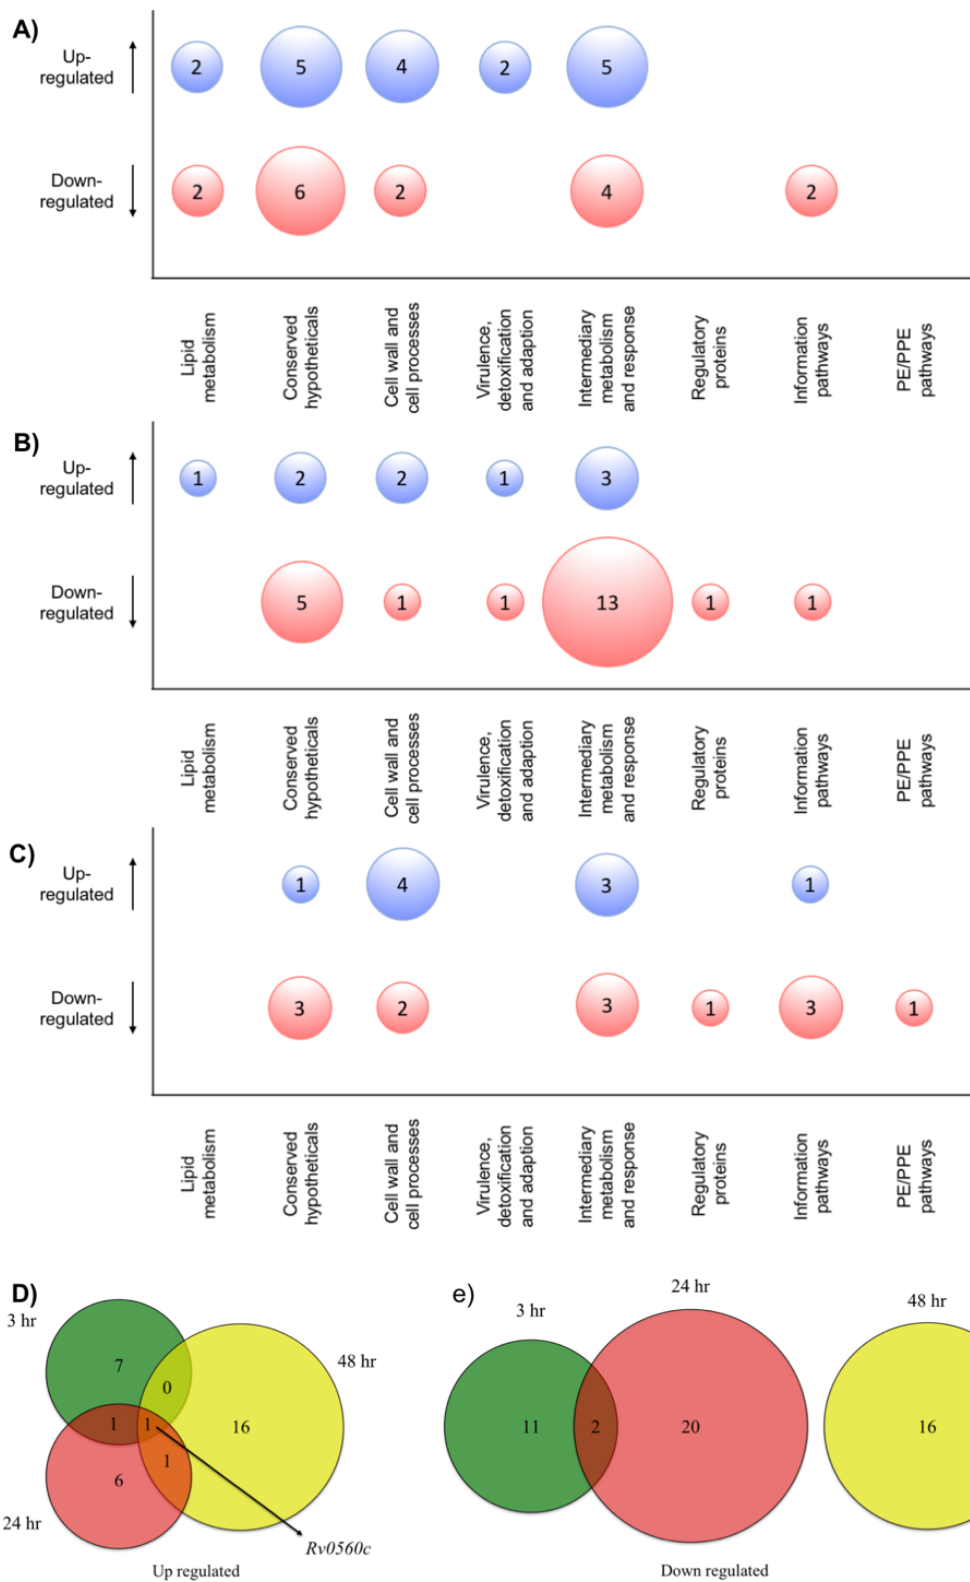

203

204

205 **Fig. 5.** Whole cell proteomic analysis in response to **6**. Bubble plots show *Mtb* proteins that are up- or down-  
 206 regulated at A) 3 hours, B) 24 hours and C) 48 hour. Venn diagrams indicate the number of proteins that are  
 207 D) up-regulated or E) down-regulated after 3 hours (green), 24 hours (red) or 48 hours (yellow) exposure to **6**.  
 208

209

210 The proteins from two functional groups: category 3 (cell wall and cell processes) and category 7  
211 (intermediary metabolism and respiration) were particularly affected, indicating that *Mtb* has a  
212 general stress response upon exposure of the dimeric boronic acids. In general, we found little overlap  
213 in the proteins that were either up- or down-regulated at the different time points (Fig. 5). However  
214 it was particularly notable that one identical protein that is involved in intermediary metabolism and  
215 respiration: Rv0560c, was upregulated >200 fold at 3 hours, 24 hours and 48 hours post-exposure to  
216 **6**. Rv0560c is a putative benzoquinone methyltransferase that has been associated with an increase  
217 in oxygen consumption by *Mtb* and is an indicator of a stress response.<sup>32, 33</sup> Crucially, we detected  
218 no up- or down-regulation of penicillin binding proteins,  $\beta$ -lactamases, proteases and tRNA  
219 synthetase proteins (Supplementary List S1) that have been implicated as targets for mono-boronic  
220 acids<sup>27, 28, 34-36</sup> enabling us to rule out these intracellular targets, in-line with the meropenem  
221 checkerboard assays (Fig. S5, Table S3). Taken together this confirms that the multivalent  
222 presentation of boronic acids affords a new route to kill *Mtb*.

223

## 224 **Conclusions**

225 In conclusion, here we have introduced a new approach to selectively kill *Mtb* by chelation of its  
226 unique cell wall glycans using multivalent boronic acids. This is conceptually distinct from existing  
227 drugs, which target defined intracellular pathways and hence must also permeate the *Mtb* cell  
228 envelope that confers intrinsic resistance to many antibiotics. The multivalent boronic acids were  
229 shown to selectively kill mycobacteria over other bacterial species. The distance between boronic  
230 acids was crucial with longer linkers reducing activity and selectivity. Two boronic acid units were  
231 optimal, with a tetramer (**8**) showing almost identical activity to the dimers. Biolayer interferometry  
232 revealed strong and selective interactions with isolated *Mtb* glycans and whole intact *Mtb* cells and  
233 whole cell proteomics identified a broad stress response rather than a single target, which may  
234 contribute to the lack of resistance observed. The multimeric display of boronic acids was crucial to  
235 their mechanism of action and distinct function compared to analogous monovalent boronic acids.  
236 This concept of inhibiting the extracellular glycans on *Mtb* presents a unique opportunity to develop  
237 pathogen specific agents and represents an important step in the identification of new TB drug targets.

238

239 **Conflicts of interest**

240 The authors (CSG, MIG and EF) are named inventors on a patent application relating to this work.

241

242 **Acknowledgements**

243 This work was supported by the Antimicrobial Resistance Cross Council Initiative supported by the  
244 seven Research Councils (grant no. MR/N006917/1), the EPSRC (grant no. EP/M027503/1) and the  
245 Royal Society (grant no. RG120405). EF holds a Sir Henry Dale Fellowship jointly funded by the  
246 Wellcome Trust and the Royal Society (grant no. 104193/Z/14/Z). The authors also acknowledge  
247 Trisha Bailey and Juan Hernandez-Fernaund for technical assistance and the WPH Proteomics Facility  
248 RTP, University of Warwick, and for assistance with the proteomics studies. *Mycobacterium*  
249 *tuberculosis* H37Rv cell envelope components and gamma irradiated whole cells were obtained  
250 through BEI Resources, NIAID, NIH.

251

252 **Notes and references**

253

- 254 1. WHO Global Tuberculosis Report, [http://www.who.int/tb/publications/global\\_report/en/](http://www.who.int/tb/publications/global_report/en/)).
- 255 2. P. J. Brennan and H. Nikaido, *Annu Rev Biochem*, 1995, **64**, 29-63.
- 256 3. P. J. Brennan, *Tuberculosis (Edinb)*, 2003, **83**, 91-97.
- 257 4. M. Jackson, *Cold Spring Harb Perspect Med*, 2014, **4**.
- 258 5. A. Lemassu and M. Daffe, *Biochem. J.*, 1994, **297 ( Pt 2)**, 351-357.
- 259 6. A. Ortalo-Magne, M. A. Dupont, A. Lemassu, A. B. Andersen, P. Gounon and M. Daffe,  
260 *Microbiology*, 1995, **141 ( Pt 7)**, 1609-1620.
- 261 7. A. Banerjee, E. Dubnau, A. Quemard, V. Balasubramanian, K. S. Um, T. Wilson, D. Collins,  
262 G. de Lisle and W. R. Jacobs, Jr., *Science*, 1994, **263**, 227-230.
- 263 8. K. Mikusova, R. A. Slayden, G. S. Besra and P. J. Brennan, *Antimicrob Agents Chemother*,  
264 1995, **39**, 2484-2489.
- 265 9. J. L. Strominger, E. Ito and R. H. Threnn, *J Am Chem Soc*, 1960, **82**, 998-999.
- 266 10. G. A. Prosser and L. P. de Carvalho, *ACS Med Chem Lett*, 2013, **4**, 1233-1237.
- 267 11. M. Chatterji, R. Shandil, M. R. Manjunatha, S. Solapure, V. Ramachandran, N. Kumar, R.  
268 Saralaya, V. Panduga, J. Reddy, K. R. Prabhakar, S. Sharma, C. Sadler, C. B. Cooper, K.  
269 Mdluli, P. S. Iyer, S. Narayanan and P. S. Shirude, *Antimicrob Agents Chemother*, 2014, **58**,  
270 5325-5331.
- 271 12. V. Makarov, G. Manina, K. Mikusova, U. Mollmann, O. Ryabova, B. Saint-Joanis, N. Dhar,  
272 M. R. Pasca, S. Buroni, A. P. Lucarelli, A. Milano, E. De Rossi, M. Belanova, A. Bobovska,  
273 P. Dianiskova, J. Kordulakova, C. Sala, E. Fullam, P. Schneider, J. D. McKinney, P. Brodin,  
274 T. Christophe, S. Waddell, P. Butcher, J. Albrethsen, I. Rosenkrands, R. Brosch, V. Nandi, S.  
275 Bharath, S. Gaonkar, R. K. Shandil, V. Balasubramanian, T. Balganes, S. Tyagi, J. Grosset,  
276 G. Riccardi and S. T. Cole, *Science*, 2009, **324**, 801-804.
- 277 13. V. Makarov, B. Lechartier, M. Zhang, J. Neres, A. M. van der Sar, S. A. Raadsen, R. C.  
278 Hartkoorn, O. B. Ryabova, A. Vocat, L. A. Decosterd, N. Widmer, T. Buclin, W. Bitter, K.  
279 Andries, F. Pojer, P. J. Dyson and S. T. Cole, *EMBO Mol Med*, 2014, **6**, 372-383.
- 280 14. M. Matsumoto, H. Hashizume, T. Tomishige, M. Kawasaki, H. Tsubouchi, H. Sasaki, Y.  
281 Shimokawa and M. Komatsu, *PLoS Med*, 2006, **3**, e466.
- 282 15. K. Mdluli, T. Kaneko and A. Upton, *Cold Spring Harb Perspect Med*, 2015, **5**.
- 283 16. M. Daffe and P. Draper, *Adv Microb Physiol*, 1998, **39**, 131-203.
- 284 17. O. Neyrolles and C. Guilhot, *Tuberculosis (Edinb)*, 2011, **91**, 187-195.

- 285 18. S. Pitarque, G. Larrouy-Maumus, B. Payre, M. Jackson, G. Puzo and J. Nigou, *Tuberculosis*  
286 (*Edinb*), 2008, **88**, 560-565.
- 287 19. K. A. Abrahams and G. S. Besra, *Parasitology*, 2018, **145**, 116-133.
- 288 20. L. Favrot and D. R. Ronning, *Expert Rev Anti Infect Ther*, 2012, **10**, 1023-1036.
- 289 21. J. Arnaud, A. Audfray and A. Imberty, *Chem Soc Rev*, 2013, **42**, 4798-4813.
- 290 22. H. G. Kuivila, A. H. Keough and E. J. Soboczenski, *J. Org. Chem.*, 1954, **19**, 780-783.
- 291 23. P. Hunter, *EMBO Rep*, 2009, **10**, 125-128.
- 292 24. J. Adams and M. Kauffman, *Cancer Invest*, 2004, **22**, 304-311.
- 293 25. B. E. Elewski, R. Aly, S. L. Baldwin, R. F. Gonzalez Soto, P. Rich, M. Weisfeld, H. Wiltz,  
294 L. T. Zane and R. Pollak, *J Am Acad Dermatol*, 2015, **73**, 62-69.
- 295 26. J. C. Palomino, A. Martin, M. Camacho, H. Guerra, J. Swings and F. Portaels, *Antimicrob*  
296 *Agents Chemother*, 2002, **46**, 2720-2722.
- 297 27. J. Brem, R. Cain, S. Cahill, M. A. McDonough, I. J. Clifton, J. C. Jimenez-Castellanos, M. B.  
298 Avison, J. Spencer, C. W. Fishwick and C. J. Schofield, *Nat Commun*, 2016, **7**, 12406.
- 299 28. S. G. Kurz, S. Hazra, C. R. Bethel, C. Romagnoli, E. Caselli, F. Prati, J. S. Blanchard and R.  
300 A. Bonomo, *ACS Infect Dis*, 2015, **1**, 234-242.
- 301 29. B. Lechartier, R. C. Hartkoorn and S. T. Cole, *Antimicrob Agents and Chemother*, 2012, **56**,  
302 5790-5793.
- 303 30. R. Leclercq, E. Derlot, J. Duval and P. Courvalin, *N Engl J Med*, 1988, **319**, 157-161.
- 304 31. L. L. Ling, T. Schneider, A. J. Peoples, A. L. Spoering, I. Engels, B. P. Conlon, A. Mueller,  
305 T. F. Schäberle, D. E. Hughes, S. Epstein, M. Jones, L. Lazarides, V. A. Steadman, D. R.  
306 Cohen, C. R. Felix, K. A. Fetterman, W. P. Millett, A. G. Nitti, A. M. Zullo, C. Chen and K.  
307 Lewis, *Nature*, 2015, **517**, 455.
- 308 32. A. Kapopoulou, J. M. Lew and S. T. Cole, *Tuberculosis (Edinb)*, 2011, **91**, 8-13.
- 309 33. Z. Sun, S. J. Cheng, H. Zhang and Y. Zhang, *FEMS Microbiol Lett*, 2001, **203**, 211-216.
- 310 34. S. T. Cahill, R. Cain, D. Y. Wang, C. T. Lohans, D. W. Wareham, H. P. Oswin, J. Mohammed,  
311 J. Spencer, C. W. Fishwick, M. A. McDonough, C. J. Schofield and J. Brem, *Antimicrob*  
312 *Agents Chemother*, 2017, **61**.
- 313 35. W. Moreira, G. J. Ngan, J. L. Low, A. Poulsen, B. C. Chia, M. J. Ang, A. Yap, J. Fulwood,  
314 U. Lakshmanan, J. Lim, A. Y. Khoo, H. Flotow, J. Hill, R. M. Raju, E. J. Rubin and T. Dick,  
315 *MBio*, 2015, **6**, e00253-00215.
- 316 36. F. L. Rock, W. Mao, A. Yaremchuk, M. Tukalo, T. Crepin, H. Zhou, Y. K. Zhang, V.  
317 Hernandez, T. Akama, S. J. Baker, J. J. Plattner, L. Shapiro, S. A. Martinis, S. J. Benkovic,  
318 S. Cusack and M. R. Alley, *Science*, 2007, **316**, 1759-1761.
